# Supplementary material
Source: PubMed Central journal article supplement (PMC4337250)
Supplement: NIHMS623771-supplement.pdf [file NIHMS623771-supplement.pdf]

## Supporting Information

### Design, Synthesis, and Application of Fluorine-Labeled Taxoids as $^{19}\text{F}$ NMR Probes for the Metabolic Stability Assessment of Tumor-Targeted Drug Delivery Systems

Joshua D. Seitz<sup>1†</sup>, Jacob G. Vineberg<sup>1†</sup>, Longfei Wei<sup>1</sup>, Jonathan F. Khan<sup>1</sup>, Brendan Lichtenthal<sup>1</sup>,  
Chi-Feng Lin<sup>1</sup>, Iwao Ojima<sup>1,2\*</sup>

<sup>1</sup>*Department of Chemistry, State University of New York at Stony Brook,  
Stony Brook, NY, 11794-3400*

<sup>2</sup>*Institute of Chemical Biology & Drug Discovery, State University of New York at Stony Brook,  
Stony Brook, NY, 11794-3400*

#### Table of Contents

|             | Page Number |
|-------------|-------------|
| Figure S1.  | S2          |
| Figure S2.  | S2          |
| Figure S3.  | S3          |
| Figure S4.  | S3          |
| Figure S5.  | S4          |
| Figure S6.  | S4          |
| Figure S7.  | S5          |
| Figure S8.  | S5          |
| Figure S9.  | S6          |
| Figure S10. | S6          |
| Figure S11. | S7          |
| Figure S12. | S7          |
| Table S1.   | S8          |

<sup>†</sup> These authors contributed equally to this work

\*Corresponding author. Tel: +1-631-632-1339; Fax: +1-631-632-7942.

E-mail address: [iwao.ojima@stonybrook.edu](mailto:iwao.ojima@stonybrook.edu)

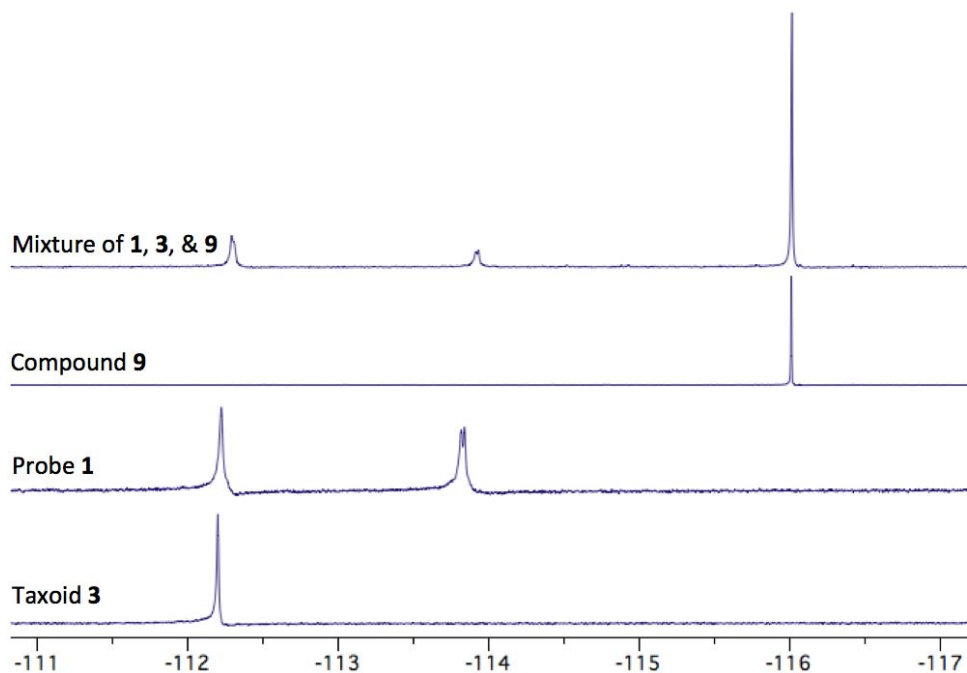

**Figure S1.**  $^{19}\text{F}$  NMR spectra showing individual chemical shifts of probe **1**, taxoid **3**, thiolactone **9**, and a mixture of **1**, **3**, and **9** in  $\text{D}_2\text{O}$ -DMSO (70:30).

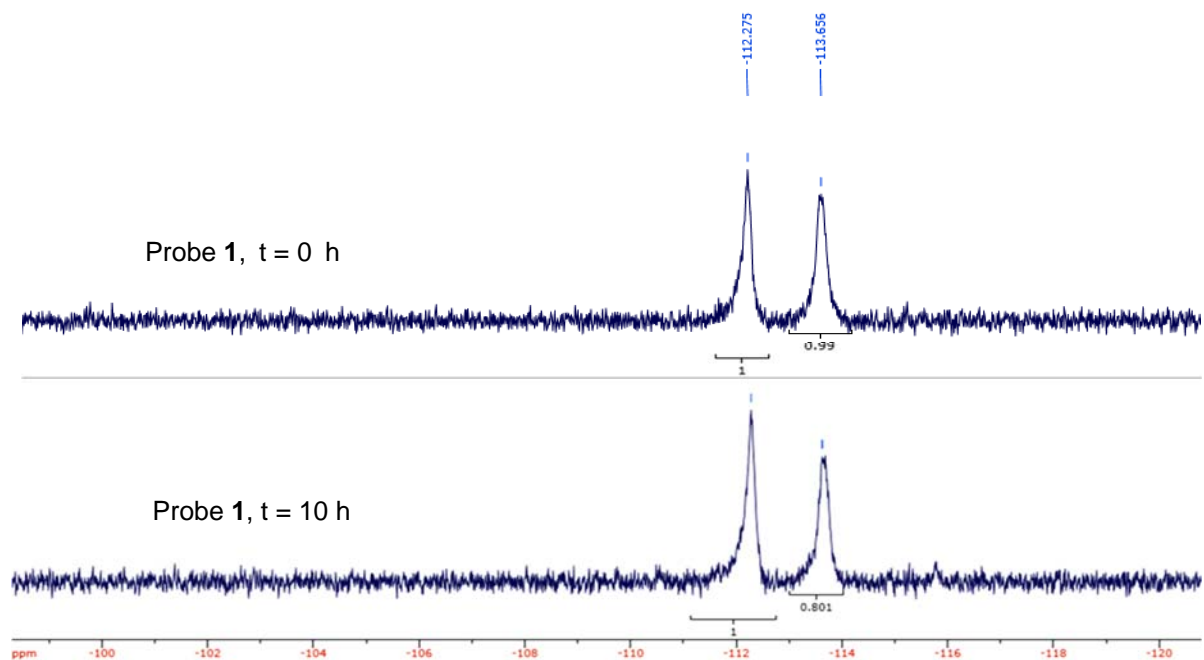

**Figure S2.**  $^{19}\text{F}$  NMR spectra of **1** (2.5 mM) formulated in 5% solutol, 5% ethanol, 70% saline, 20%  $\text{D}_2\text{O}$  before (top) and after (10 h) (bottom) the addition of 6 equiv. of GSH. Integration of the signals clearly depicts  $\sim 20\%$  cleavage of the disulfide bond.

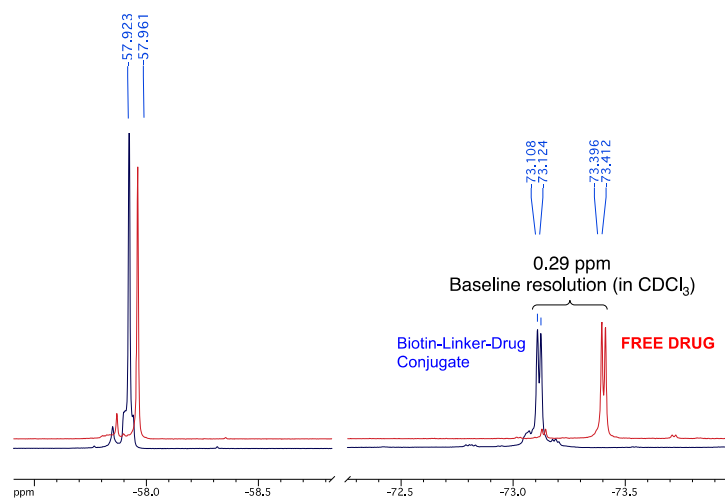

**Figure S3.**  $^{19}\text{F}$  NMR spectral overlay showing individual chemical shifts of probe **2** (blue) and taxoid **4** (red) in  $\text{CDCl}_3$  (Table 1, Entry 1).

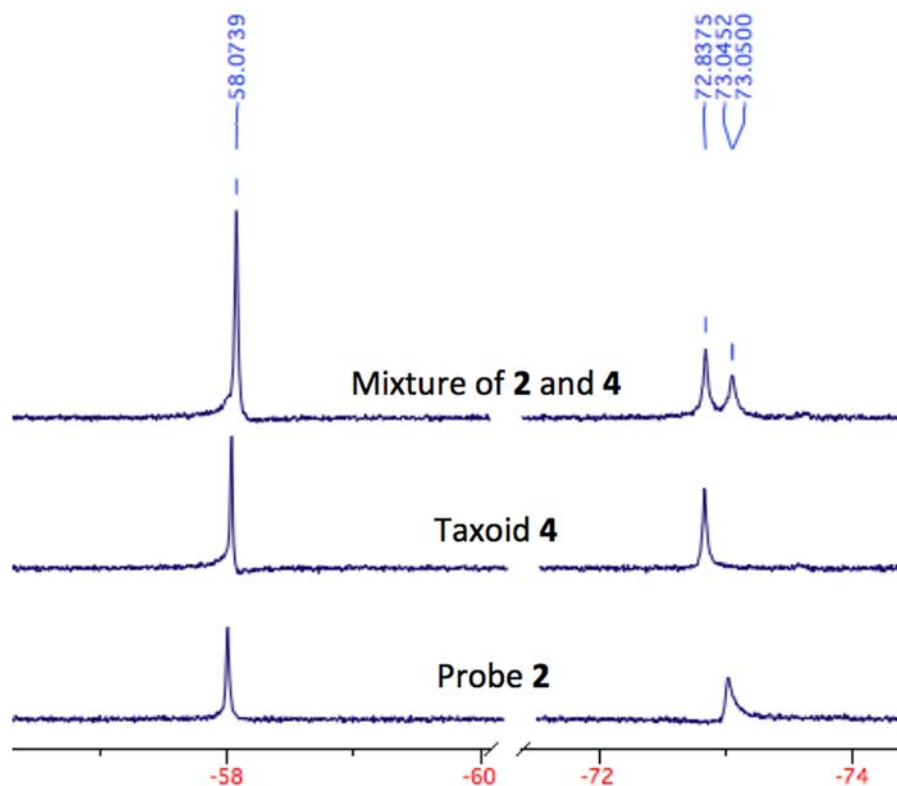

**Figure S4.**  $^{19}\text{F}$  NMR spectra (1024 scans) showing individual chemical shifts of 200  $\mu\text{M}$  solutions of **2** and **4** in blood plasma- $\text{D}_2\text{O}$ -ethanol-polysorbate 80 (86:10:2:2), and a 1:1 mixture of **2** and **4** in blood plasma- $\text{D}_2\text{O}$ -ethanol-polysorbate 80 (84:10:4:2) (Table 1, Entry 2).

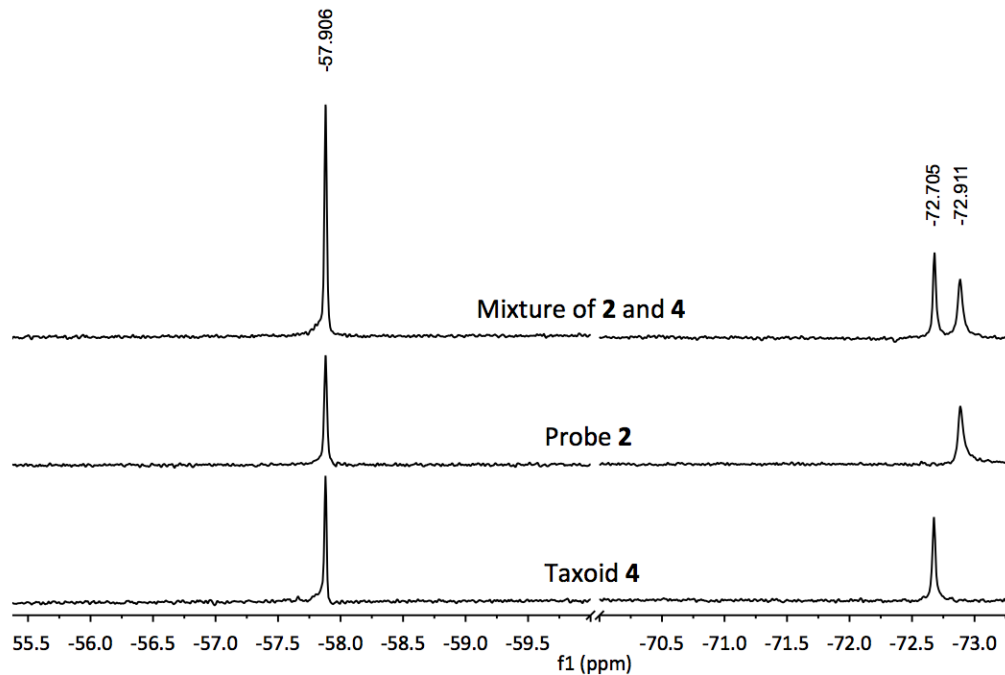

**Figure S5.**  $^{19}\text{F}$  NMR spectra (512 scans) showing individual chemical shifts of 200  $\mu\text{M}$  solutions of **2** and **4** in RPMI 1640- $\text{D}_2\text{O}$ -ethanol-polysorbate 80 (86:10:2:2), and a 1:1 mixture of **2** and **4** in RPMI 1640- $\text{D}_2\text{O}$ -ethanol-polysorbate 80 (84:10:4:2) (Table 1, Entry 3).

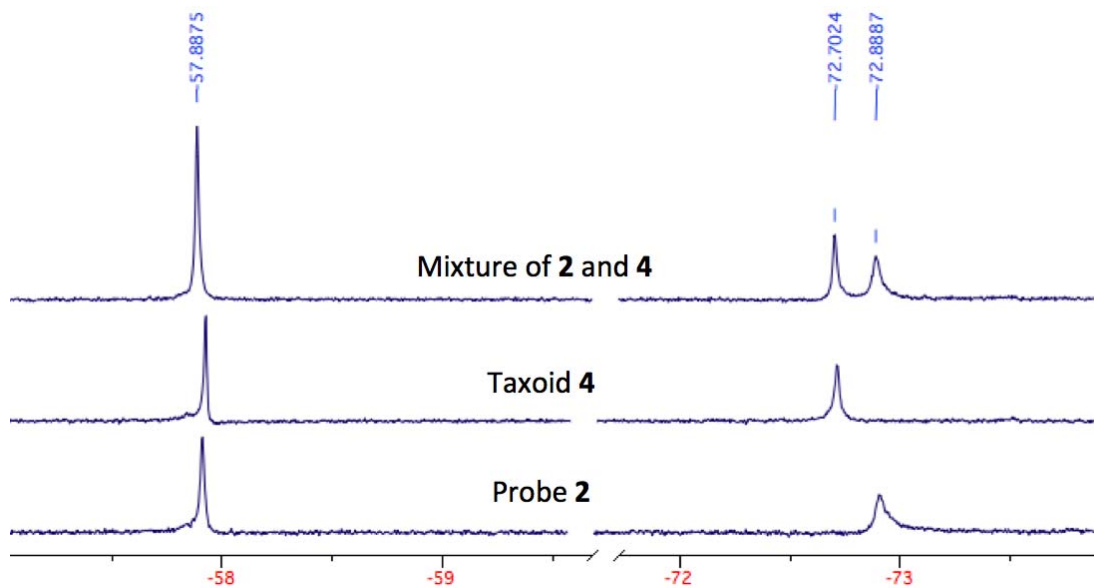

**Figure S6.**  $^{19}\text{F}$  NMR spectra (512 scans) showing individual chemical shifts of 200  $\mu\text{M}$  solutions of **2** and **4** in  $\text{D}_2\text{O}$ -ethanol-polysorbate 80 (96:2:2), and a 1:1 mixture of **2** and **4** in  $\text{D}_2\text{O}$ -ethanol-polysorbate 80 (94:4:2) (Table 1, Entry 4).

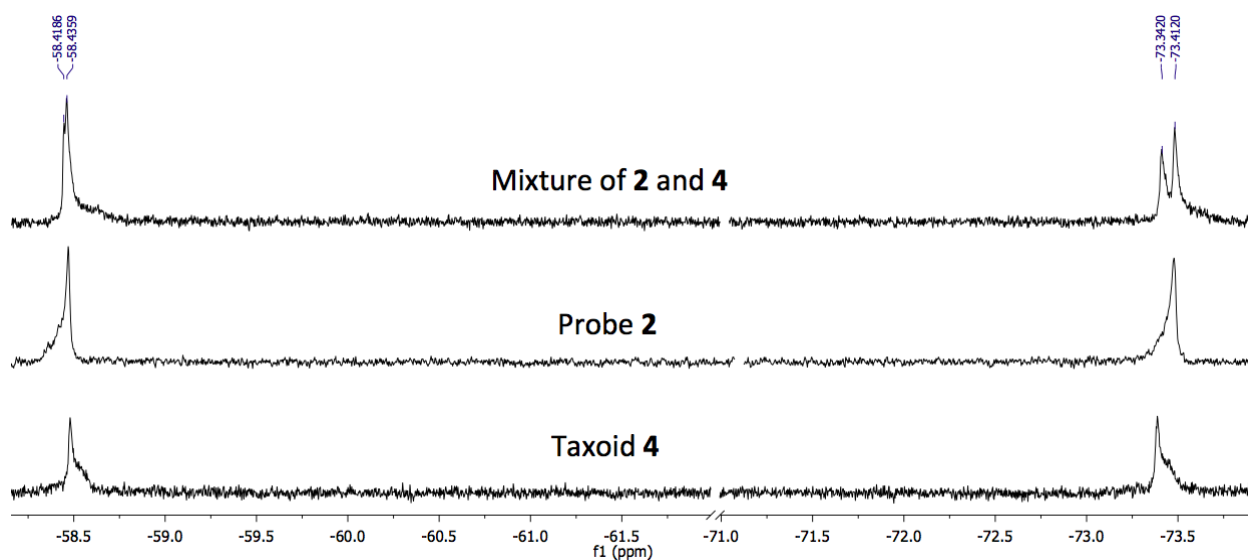

**Figure S7.**  $^{19}\text{F}$  NMR spectra (220 scans) showing individual chemical shifts of 200  $\mu\text{M}$  solutions of **2** and **4**, and a 1:1 mixture of **2** and **4** in saline- $\text{D}_2\text{O}$ -ethanol (50:40:10) (Table 1, Entry 5).

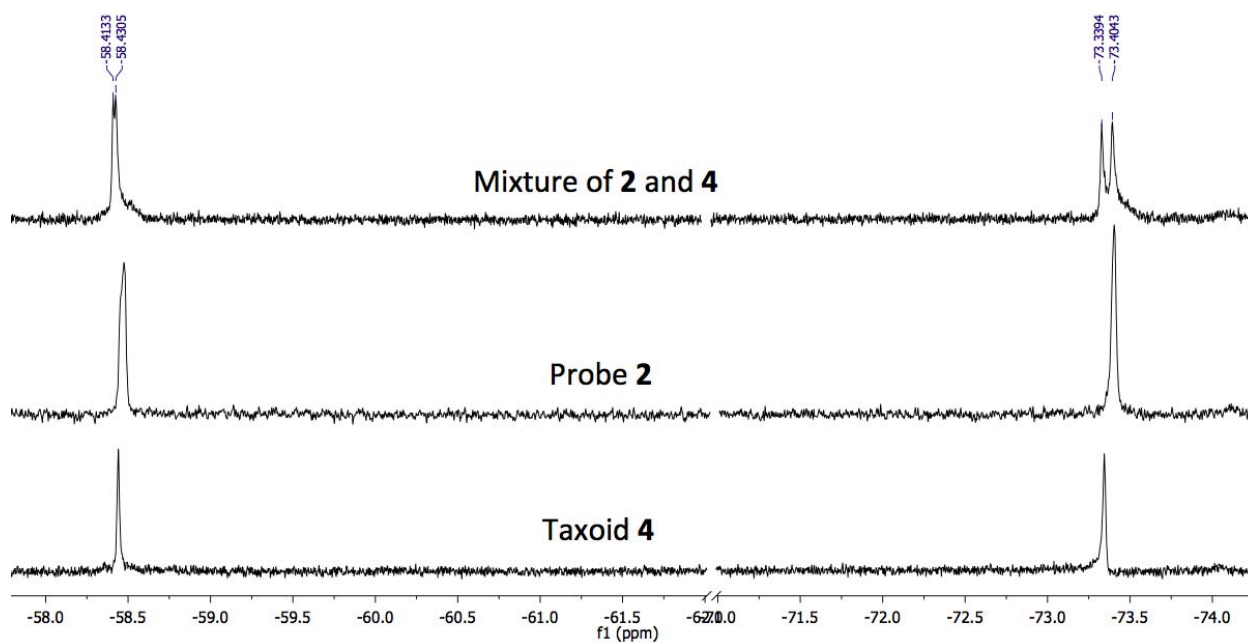

**Figure S8.**  $^{19}\text{F}$  NMR spectra (220 scans) showing individual chemical shifts of 200  $\mu\text{M}$  solutions of **2** and **4**, and a 1:1 mixture of **2** and **4** in PBS- $\text{D}_2\text{O}$ -ethanol (50:40:10) (Table 1, Entry 6).

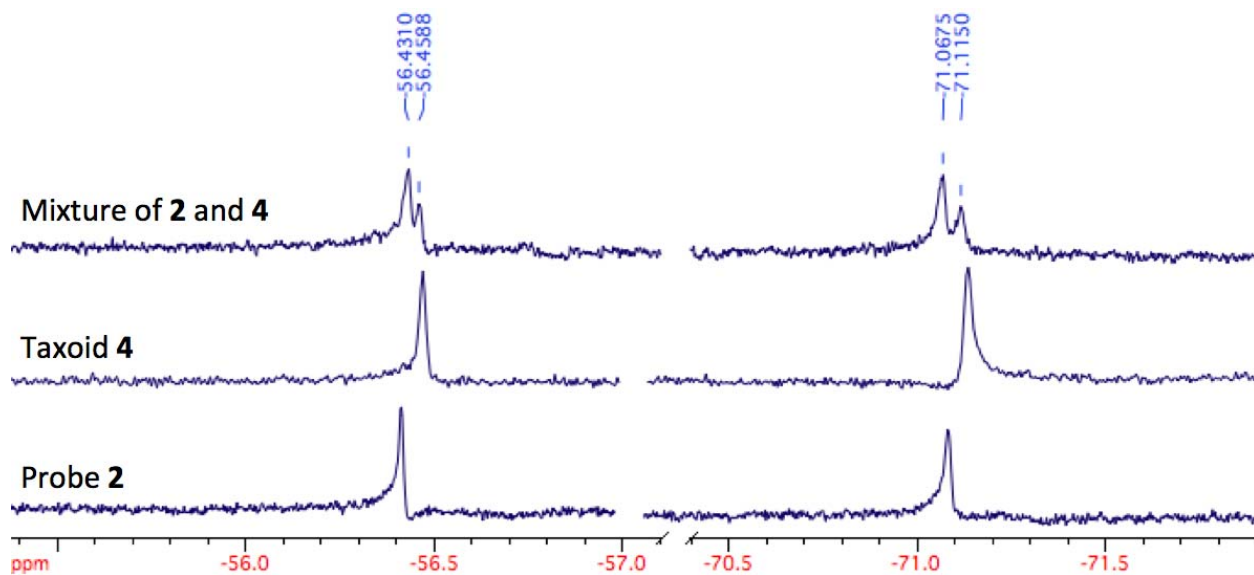

**Figure S9.**  $^{19}\text{F}$  NMR spectra (1024 scans) showing individual chemical shifts of 200  $\mu\text{M}$  solutions of **2**, **4**, and a 1:1 mixture of **2** and **4** in DMSO- $\text{D}_2\text{O}$  (70:30) (Table 1, Entry 7).

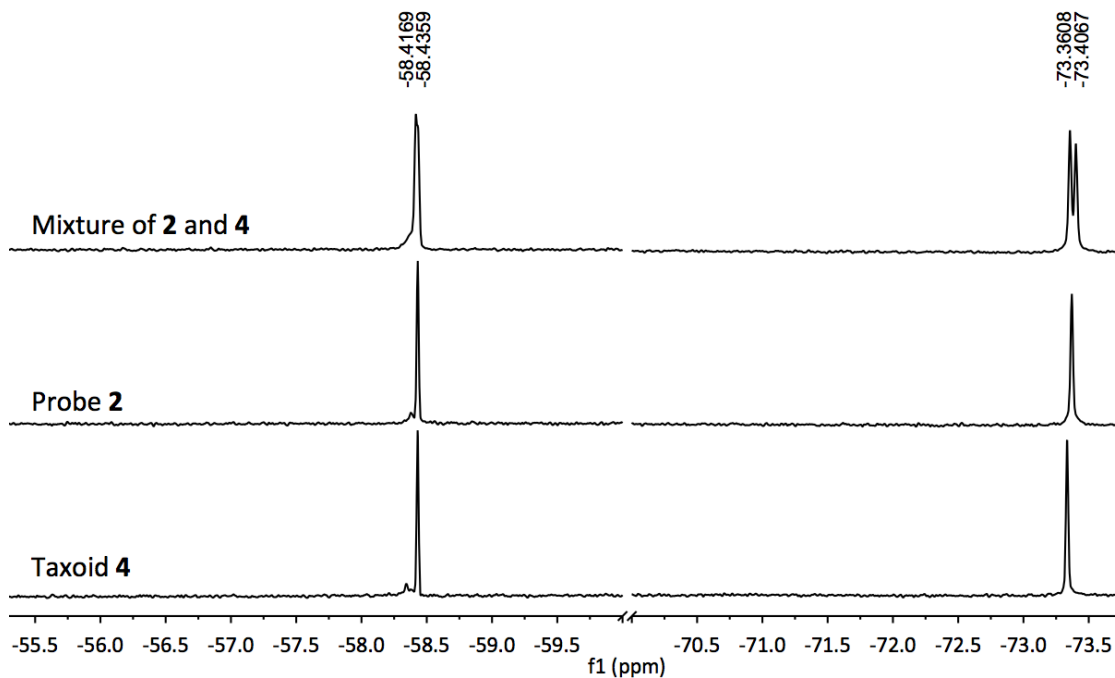

**Figure S10.**  $^{19}\text{F}$  NMR spectra (512 scans) showing individual chemical shifts of 200  $\mu\text{M}$  solutions of **2**, **4**, and a 1:1 mixture of **2** and **4** in  $\text{D}_2\text{O}$ -ethanol (60:40) (Table 1, Entry 8).

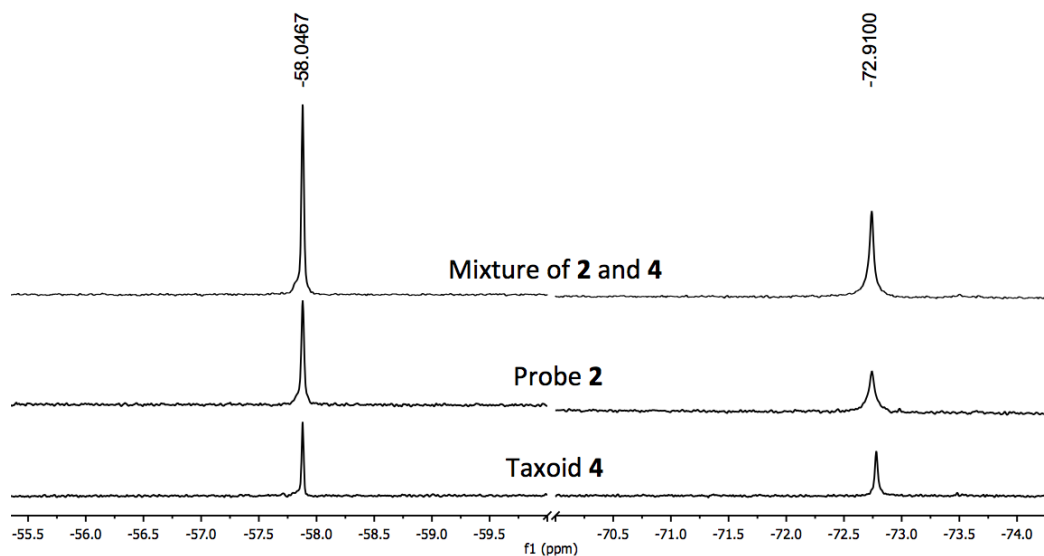

**Figure S11.**  $^{19}\text{F}$  NMR spectra (>268 scans) showing individual chemical shifts of 200  $\mu\text{M}$  solutions of **2**, **4**, and a 1:1 mixture of **2** and **4** in  $\text{D}_2\text{O}$ -ethanol-solutol HS15 (84:8:8) (Table 1, Entry 9).

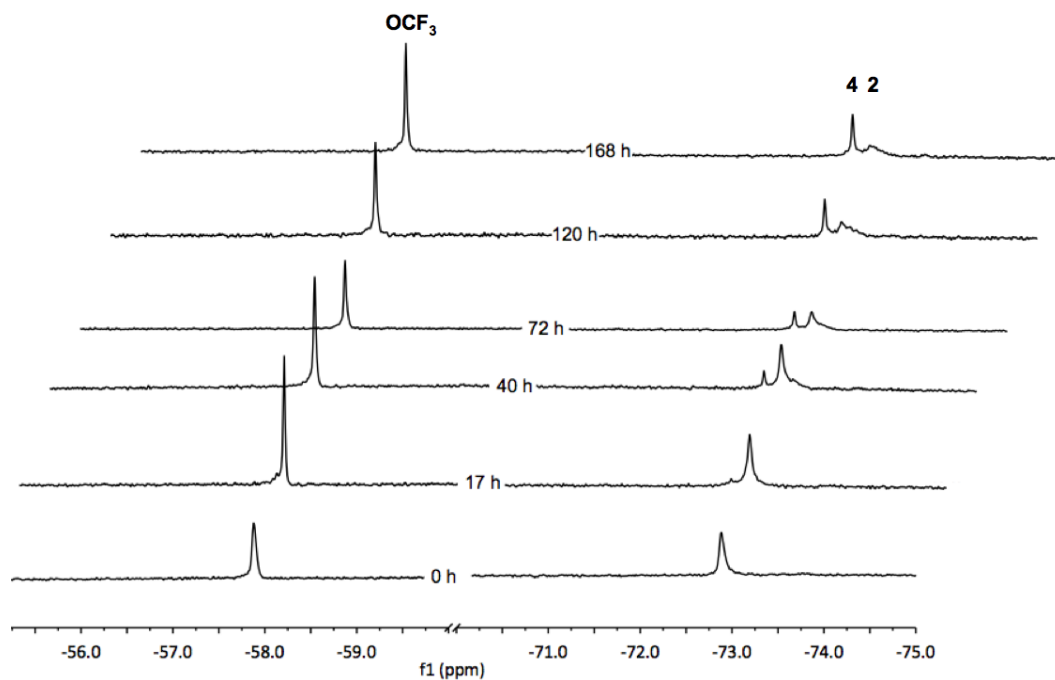

**Figure S12.**  $^{19}\text{F}$  NMR spectra (>512 scans) showing chemical shifts of a 200  $\mu\text{M}$  solution of **2** and released taxoid **4** with 100 equivalents of GSH in  $\text{D}_2\text{O}$ -ethanol-polysorbate 80 (96:2:2) at 0, 17, 40, 72, 120, and 168 h, indicating a  $t_{1/2}$  of approximately 4 d.

**Table S1.**

Experimental data and normalized values for the drug release study of probe **4**, shown in Figure 7.

| time (h) | Normalized Integration for <b>2</b> | Normalized Integration for <b>4</b> |
|----------|-------------------------------------|-------------------------------------|
| 0        | 1                                   | 0                                   |
| 1        | 0.841018667                         | 0.158981333                         |
| 2        | 0.658950264                         | 0.341049736                         |
| 3        | 0.500068503                         | 0.499931497                         |
| 4        | 0.37350062                          | 0.62649938                          |
| 5        | 0.23476298                          | 0.76523702                          |
| 6        | 0.152388797                         | 0.847611203                         |
| 7        | 0.110911486                         | 0.889088514                         |
| 8        | 0.094353851                         | 0.905646149                         |
| 9        | 0.054218871                         | 0.945781129                         |
| 10       | 0.028866218                         | 0.971133782                         |
| 11       | 0.019893467                         | 0.980106533                         |
| 12       | 0.020392911                         | 0.979607089                         |
| 13       | 0.014137708                         | 0.985862292                         |

| time (h) | Experimental Integration for <b>2</b> | Experimental Integration for <b>4</b> |
|----------|---------------------------------------|---------------------------------------|
| 0        | 1                                     | 0                                     |
| 1        | 0.6803                                | 0.1286                                |
| 2        | 0.575                                 | 0.2976                                |
| 3        | 0.365                                 | 0.3649                                |
| 4        | 0.2709                                | 0.4544                                |
| 5        | 0.1976                                | 0.6441                                |
| 6        | 0.1295                                | 0.7203                                |
| 7        | 0.0926                                | 0.7423                                |
| 8        | 0.1001                                | 0.9608                                |
| 9        | 0.0489                                | 0.853                                 |
| 10       | 0.0249                                | 0.8377                                |
| 11       | 0.0183                                | 0.9016                                |
| 12       | 0.0191                                | 0.9175                                |
| 13       | 0.0131                                | 0.9135                                |
